# Supplementary material for: Robust and highly efficient blue light-emitting hosts based on indene-substituted anthracene
Source: Royal Society of Chemistry journal article supplement (doi:10.1039/c000092b), 2010-01-01
Supplement: c000092b.pdf [file c000092b.pdf]

## Supporting Information (SI)

# **Robust blue hosts containing indene-substituted anthracene chromophores for highly efficient organic light-emitting diodes**

Zhen-Yuan Xia,<sup>a</sup> Zhi-Yun Zhang,<sup>a</sup> Jian-Hua Su,<sup>a</sup> Qiong Zhang,<sup>a</sup> Ka-Man Fung,<sup>b</sup> Mei-Ki Lam,<sup>b</sup> King-Fai Li,<sup>b</sup> Wai-Yeung Wong,<sup>\*c</sup> Kok-Wai Cheah,<sup>b</sup> He Tian<sup>\*a</sup> and Chin H. Chen<sup>c,d</sup>

<sup>a</sup> *Key Laboratory for Advanced Materials and Institute of Fine Chemicals, East China University of Science & Technology, Shanghai 200237, China. Fax: (+86) 21-64252288; E-mail:*

*tianhe@ecust.edu.cn*

<sup>b</sup> *Centre for Advanced Luminescence Materials, Department of Physics, Hong Kong Baptist University, Kowloon Tong, Hong Kong, China;*

<sup>c</sup> *Centre for Advanced Luminescence Materials, Department of Chemistry, Hong Kong Baptist University, Kowloon Tong, Hong Kong, China; E-mail: rwywong@hkbu.edu.hk*

<sup>d</sup> *Displays & Lighting Center, National Engineering Lab of TFT-LCD Materials and Technologies, Shanghai Jiao Tong University, Shanghai 200240, P. R. China*

## Experimental section:

### The CV curves of compounds DMIP-1-NA and DMIP-2-NA:

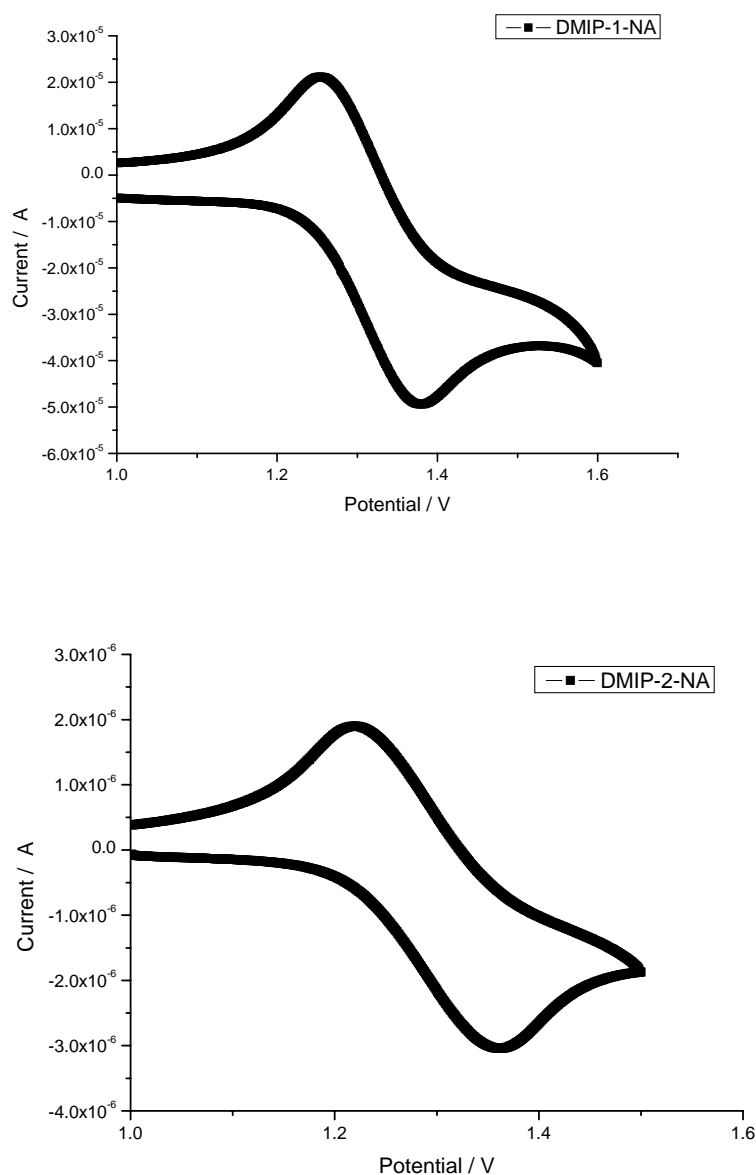

Fig. 1. CV traces of **DMIPNA** ( $1 \times 10^{-3}$  M) in  $\text{CH}_2\text{Cl}_2$  (0.1 M  $\text{Bu}_4\text{NPF}_6$ ). Working electrode: platinum disk, diameter 1 mm; sweep rate  $100 \text{ mV s}^{-1}$ . The scanning potential window was 1.0–1.6 V and back to 1.0 V.

### The DSC and TGA curves of compounds DMIP-1-NA and DMIP-2-NA:

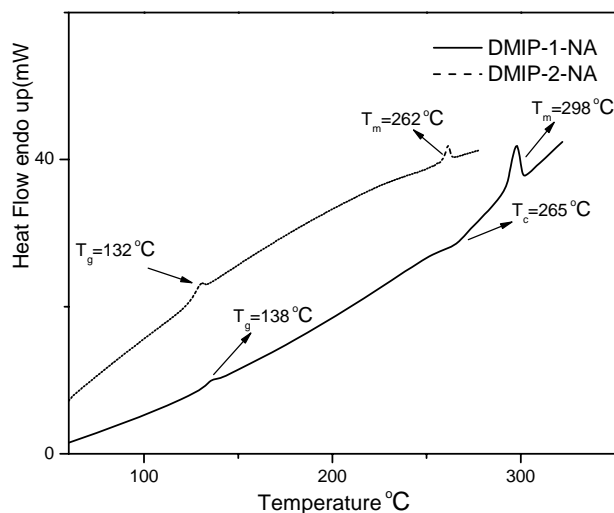

Fig. 2. The DSC spectra (differential scanning calorimetry) of the compound **DMIP-1-NA** and **DMIP-2-NA**. (10 mg sample was added to the pan, then it is heated up to 300 °C or (350 °C) at 20 °C/min and go through a quick cooling at 40 °C/min by the ice-bath, then scan it and collect the data).

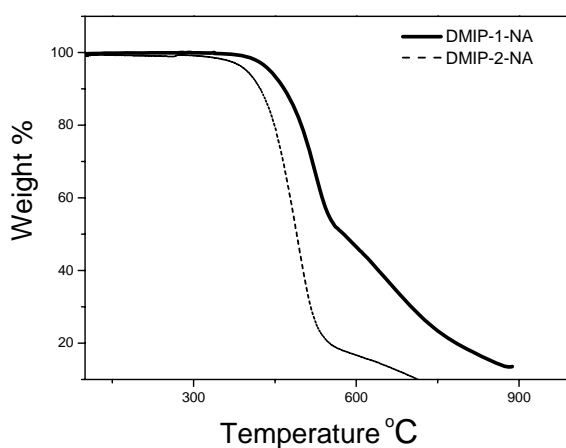

Fig. 3 The TGA spectra (thermogravimetric analysis) of the compound **DMIP-1-NA** and **DMIP-2-NA**. (The two samples were heated up to 900 °C at a heating rate of 20 °C/min).

# $^1\text{H}$ NMR, $^{13}\text{C}$ NMR and High Resolution Mass Spectra of DMIP-1-NA and DMIP-2-NA:

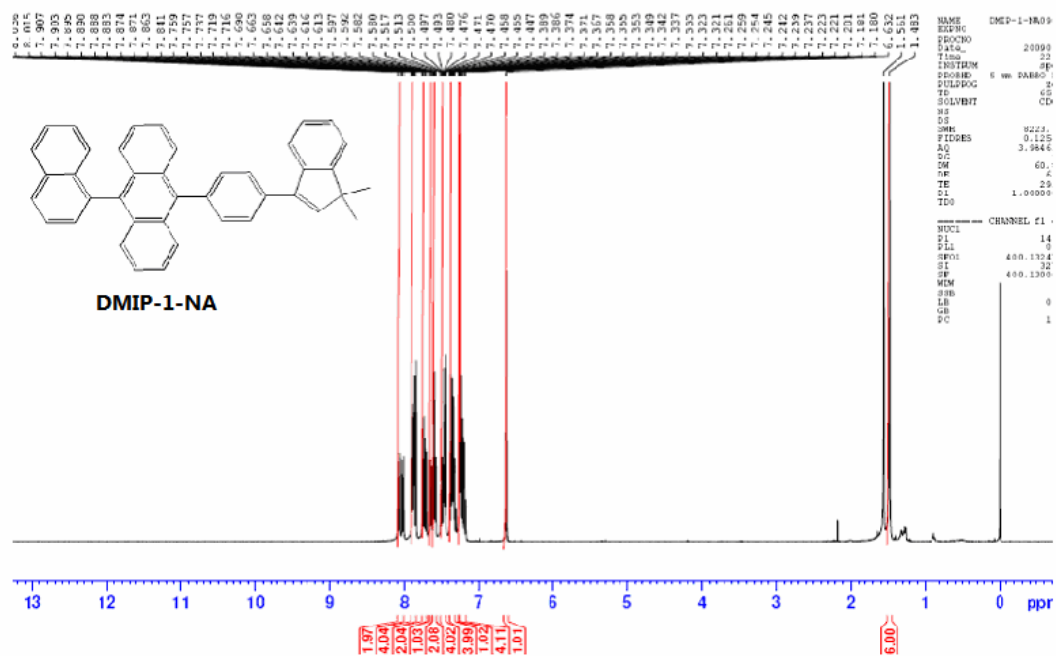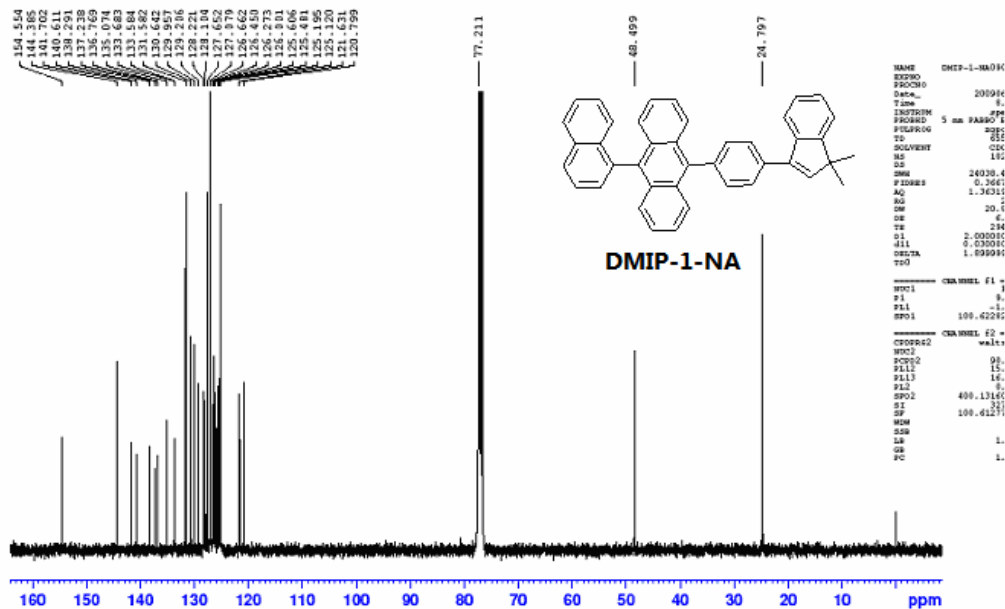

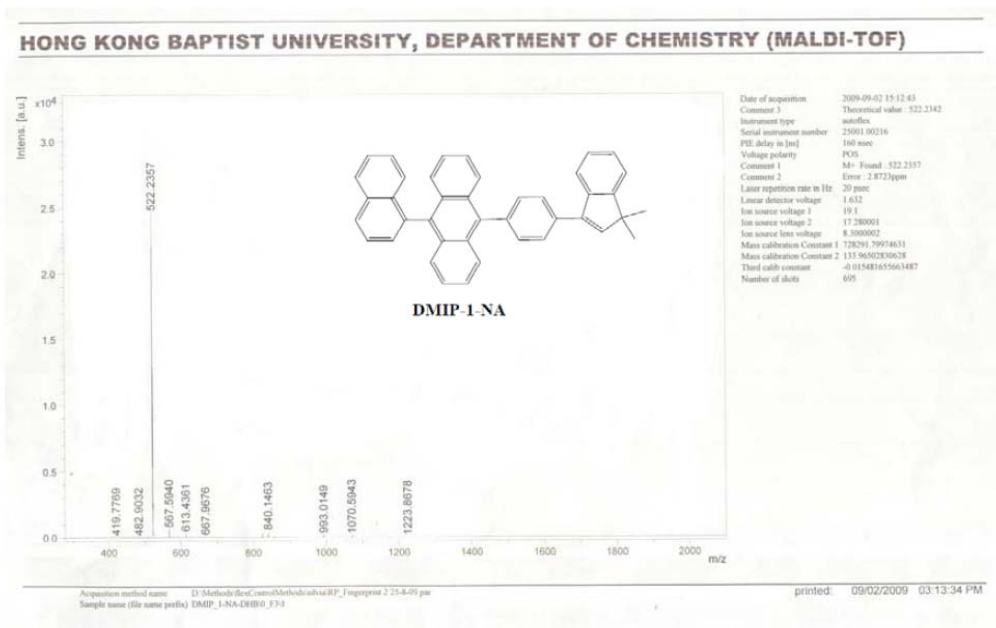

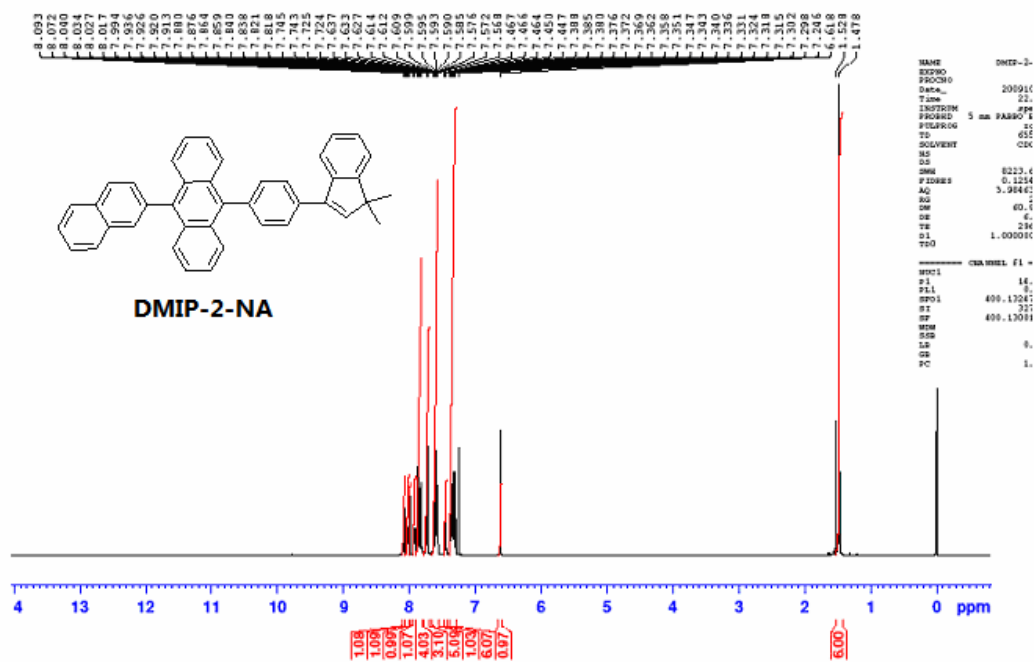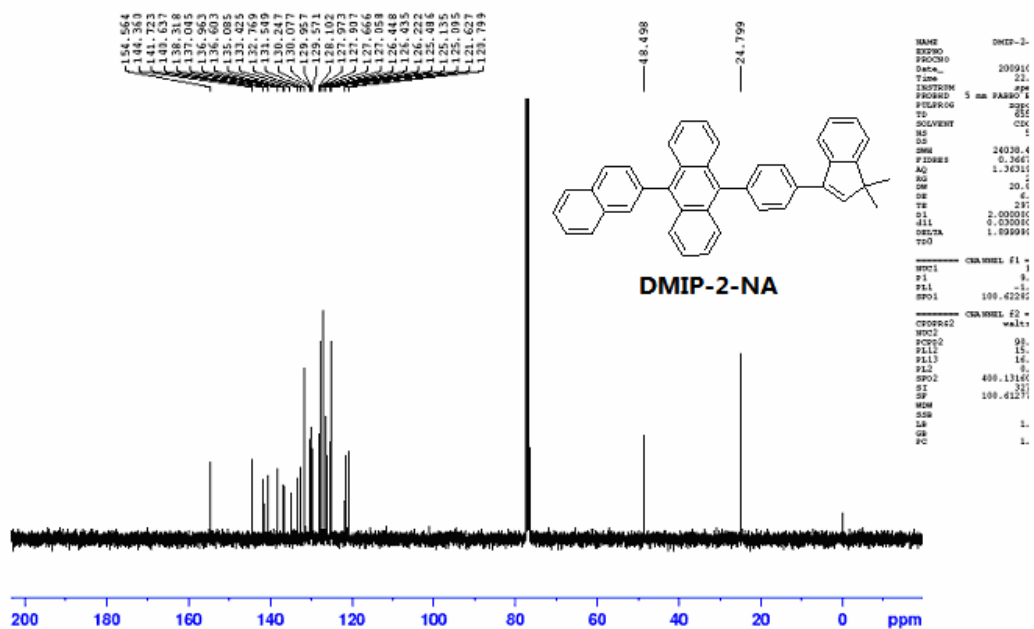

HONG KONG BAPTIST UNIVERSITY, DEPARTMENT OF CHEMISTRY (MALDI-TOF)

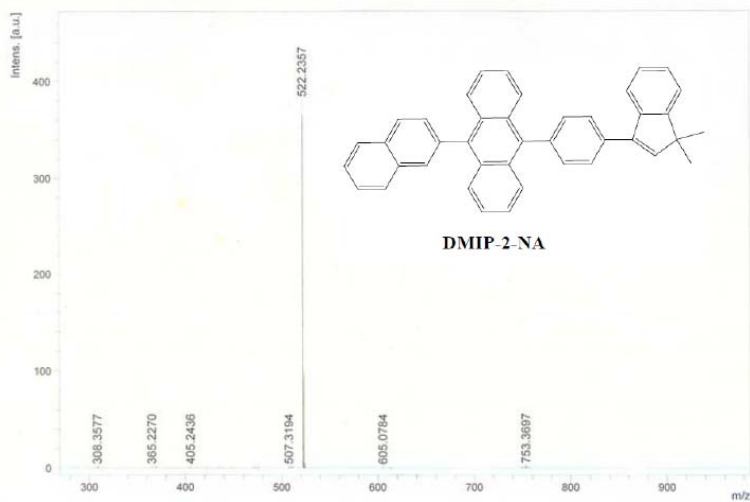

Date of acquisition 2009-09-29 16:17:01  
Comment 1 Theoretical value: 522.2343  
Instrument type autoflex  
Serial instrument number 25001.00216  
PDI delay in [ns] 120 msec  
Voltage polarity POS  
Comment 1 M+ Found: 522.2357  
Comment 2 Error: 2.8684 ppm  
Linear repetition rate in Hz 20 ppm  
Linear detector voltage 1.784  
Ion source voltage 1 19.1  
Ion source voltage 2 17.549999  
Ion source lens voltage 8.3000002  
Mass calibration Constant 1 736140.4329532149  
Mass calibration Constant 2 228.3056396028793  
Third calib constant 0.66170617344471628  
Number of shots 500

Acquisition method name D:\DM Method & Data\spn 15-7-2007\methods\spn 15-7-2007\David-Methods\New Folder\RP\_Fingerprint 2 25-8-09.par  
Sample name (file name prefix) DMIP-2-NA\_SAV0\_A611

printed: 09/29/2009 04:17:42 PM
